# Lipoprotein(a) as a Predictor of Cardiovascular Disease in a Prospectively Followed Cohort of Patients With Type 1 Diabetes

BARBARA KOLLERITS, MPH<sup>1</sup>  
MARTIN AUINGER, MD<sup>2</sup>  
VERONIKA REISIG, MD<sup>3</sup>  
THOMAS KÄSTENBAUER, PHD, MSC<sup>2</sup>

ARNO LINGENHEL, PHD<sup>1</sup>  
KARL IRSIGLER, MD<sup>2</sup>  
RUDOLF PRAGER, MD<sup>2</sup>  
FLORIAN KRONENBERG, MD<sup>1</sup>

Lipoprotein(a) [Lp(a)] concentrations are genetically determined (1,2), and numerous epidemiological studies in the general population have identified elevated Lp(a) levels as a risk factor for atherosclerotic disorders (3,4). However, this association is not as clearly defined in patients with type 1 diabetes (5), since large prospective studies are missing. We therefore analyzed the role of Lp(a) for the incidence of cardiovascular disease (CVD) complications.

## RESEARCH DESIGN AND METHODS

The 429 consecutive, unrelated type 1 diabetes patients included in this observational study were from the Hospital Lainz-Vienna. Inclusion criteria described recently (6) were regular attendance at the outpatient clinic in the last year and stable metabolic control. For patient characteristics, see Table 1. The recruitment period lasted from 1993 to 1999. Regular follow-ups were performed every 3–6 months. Yearly follow-ups included detailed history, laboratory parameters, measurement of peripheral and autonomic neuropathy, staging of retinopathy, and feet inspection.

Previous CVD complications were obtained by self reports verified from hospital records. Patients' blood was drawn after an overnight fast. Lp(a) quantifica-

tion was carried out, as described in detail (7). Apolipoprotein(a) phenotyping was performed by SDS agarose gel electrophoresis (8). Glomerular filtration rate (eGFR) was calculated from the Modification of Diet in Renal Disease equation (9).

A composite CVD end point during follow-up was defined as coronary artery disease, cerebrovascular disease, and peripheral arterial disease.

Univariate comparisons of variables were performed using unpaired *t* test, Mann-Whitney *U* test, and Pearson's  $\chi^2$  test. To investigate the influence of various variables on the risk of CVD complications, multiple Cox regression models were calculated.

**RESULTS**— Sixty of the 429 patients suffered a CVD event during the observation period of up to 10.7 years (average 5.8). These events included cases of coronary artery disease (10 myocardial infarctions, 2 coronary artery bypass grafts, 10 percutaneous transluminal angioplasties, and 4 coronary stenoses >50%), cerebrovascular disease (1 transient ischemic attack, 6 ischemic strokes, and 2 carotid endarterectomies), and 25 cases with peripheral arterial disease. Univariate comparisons of patients with and without CVD events and results of the multiple Cox regression analysis are pro-

vided in Table 1. Cox regression analysis revealed previous CVD complications, eGFR, Lp(a) >30 mg/dl, diabetes duration, HbA<sub>1C</sub> (A1C), and triglyceride levels as significant predictors of CVD complications. Previous CVD complications showed the strongest association with CVD event-free survival (hazard ratio [HR] 7.74 [4.18–14.34], *P* < 0.0001). Lp(a) >30 mg/dl was associated with a more than twofold higher risk for CVD events (2.23 [1.28–3.87], *P* = 0.004). Neither a concomitant elevation of LDL cholesterol nor a decrease of HDL cholesterol or both influenced the association of Lp(a) >30 mg/dl with CVD.

Since kidney disease is an important predictor of CVD and to exclude that the increased risk by high Lp(a) in patients with kidney impairment (10–13) is only a secondary effect of Lp(a) increasing kidney impairment, we performed three sensitivity analyses. First, we excluded patients with end-stage renal disease (ESRD) at study entry (*n* = 21); second, we excluded 110 patients either proteinuric or with microalbuminuria and/or with ESRD; and third, we excluded 40 patients with an eGFR <60 ml/min per 1.73 m<sup>2</sup> and/or ESRD. These analyses increased the estimates for Lp(a) to 2.41 (1.35–4.30, *P* = 0.003), 3.31 (1.38–7.95, *P* = 0.007), and 2.96 (1.38–6.34, *P* = 0.005), respectively.

**CONCLUSIONS**— This prospective study is the largest study in type 1 diabetes demonstrating Lp(a) >30 mg/dl as a strong and independent predictor of CVD complications (HR 2.23). Only a few studies have investigated this question in type 1 diabetic patients and reported inconsistent results. This can probably be explained by differences in study design, sample size and population, short observation periods, definition of inclusion criteria and clinical end points, and the method used to measure Lp(a). The only available 4-year prospective nested case-control study (14) in 22 patients did not identify Lp(a) as a predictor of events. Similarly, most small cross-sectional

From the <sup>1</sup>Division of Genetic Epidemiology, Innsbruck Medical University, Innsbruck, Austria; the <sup>2</sup>Hospital Vienna-Lainz, Vienna, Austria; and the <sup>3</sup>Institute of Epidemiology, GSF, Neuherberg, Germany.

Address correspondence and reprint requests to Florian Kronenberg, MD, Division of Genetic Epidemiology, Schöpfstr. 41, A-6020, Innsbruck, Austria. E-mail: florian.kronenberg@i-med.ac.at.

Received for publication 11 March 2006 and accepted in revised form 31 March 2006.

B.K. and M.A. contributed equally to this work.

**Abbreviations:** CVD, cardiovascular disease; eGFR, glomerular filtration rate; ESRD, end-stage renal disease; Lp(a), lipoprotein(a).

A table elsewhere in this issue shows conventional and Système International (SI) units and conversion factors for many substances.

DOI: 10.2337/dc06-0546

© 2006 by the American Diabetes Association.

The costs of publication of this article were defrayed in part by the payment of page charges. This article must therefore be hereby marked "advertisement" in accordance with 18 U.S.C. Section 1734 solely to indicate this fact.

Table 1—Baseline clinical characteristics and variables associated with cardiovascular outcome during follow-up of 429 patients with type 1 diabetes

| Clinical characteristics                     | Univariate comparison of patients |                                                      |                                                  | Cox regression analysis* |                   |         |
|----------------------------------------------|-----------------------------------|------------------------------------------------------|--------------------------------------------------|--------------------------|-------------------|---------|
|                                              | Entire group (n = 429)            | Without CVD complications during follow-up (n = 369) | With CVD complications during follow-up (n = 60) | P value†                 | HR (95% CI)       | P value |
| Sex (M/F)                                    | 245 (57.1)/184 (42.9)             | 206 (55.8)/163 (44.2)                                | 39(65.0)/21 (35.0)                               | 0.18                     |                   |         |
| Age (years)                                  | 39.8 ± 13.1                       | 38.3 ± 12.8                                          | 49.4 ± 10.7                                      | <0.0001                  |                   | 0.18‡   |
| Diabetes duration (years)                    | 22.1 ± 13.2                       | 20.4 ± 12.8                                          | 32.5 ± 10.0                                      | <0.0001                  |                   |         |
| Diabetes duration >22 years (median) (years) | 208 (48.5)                        | 155 (42.0)                                           | 53 (88.3)                                        | <0.0001                  |                   | 0.003   |
| A1C (%)                                      | 8.5 ± 1.4 (7.6/8.3/9.1)           | 8.4 ± 1.3 (7.6/8.2/9.0)                              | 9.0 ± 1.6 (7.9/8.7/9.7)                          | 0.005                    |                   | 0.03    |
| BMI (kg/m <sup>2</sup> )                     | 24.4 ± 3.2                        | 24.4 ± 3.2                                           | 24.4 ± 3.2                                       | 0.90                     |                   |         |
| Current smoking                              | 127 (30.2)                        | 106 (29.3)                                           | 21 (35.6)                                        | 0.55                     |                   |         |
| Hypertension§                                | 175 (40.8)                        | 130 (35.2)                                           | 45 (75.0)                                        | <0.0001                  |                   | 0.16‡   |
| eGFR (ml/min per 1.73 m <sup>2</sup> )       | 83 ± 25 (70/84/98)                | 86 ± 22 (72/86/100)                                  | 62 ± 27 (46/68/83)                               | <0.0001                  |                   | 0.006   |
| Urinary protein excretion                    |                                   |                                                      |                                                  | overall                  |                   |         |
|                                              |                                   |                                                      |                                                  | <0.0001                  |                   |         |
| No microalbuminuria                          | 331 (77.3)                        | 303 (82.3)                                           | 28 (46.7)                                        |                          |                   |         |
| Microalbuminuria 30–300 mg/day               | 45 (10.5)                         | 35 (9.5)                                             | 10 (16.7)                                        |                          | 0.40‡             |         |
| Proteinuria 300–3,500 mg/day                 | 39 (9.1)                          | 25 (6.8)                                             | 14 (23.3)                                        |                          | 0.59‡             |         |
| Nephrotic syndrome                           | 13 (3.0)                          | 5 (1.4)                                              | 8 (13.3)                                         |                          | 0.28‡             |         |
| Previous cardiovascular events               | 41 (9.6)                          | 14 (3.8)                                             | 27 (45.0)                                        | <0.0001                  |                   | <0.0001 |
| Total cholesterol (mg/dl)                    | 187 ± 43                          | 186 ± 41                                             | 195 ± 53                                         | 0.16                     |                   | 0.16‡   |
| LDL cholesterol (mg/dl)                      | 134 ± 37                          | 113 ± 36                                             | 120 ± 42                                         | 0.15                     |                   |         |
| HDL cholesterol (mg/dl)                      | 51.6 ± 17.2                       | 52.4 ± 17.5                                          | 46.4 ± 14.5                                      | 0.03                     |                   | 0.26‡   |
| Triglycerides (mg/dl)                        | 108 ± 87 (57/84/127)              | 103 ± 77 (56/82/122)                                 | 143 ± 128 (73/109/167)                           | 0.001                    |                   | 0.037   |
| Lp(a) (mg/dl)                                | 20.3 ± 27.5 (3.7/9.1/24.3)        | 19.3 ± 26.9 (3.6/8.7/21.7)                           | 25.5 ± 30.5 (4.7/13.2/38.0)                      | 0.09                     |                   |         |
| Lp(a) >30 mg/dl                              | 93 (21.8)                         | 72 (19.7)                                            | 21 (35.0)                                        | 0.008                    |                   | 0.004   |
| LMW apo(a) phenotypes                        | 115 (27.6)                        | 101 (28.2)                                           | 14 (23.7)                                        | 0.475                    |                   |         |
|                                              |                                   |                                                      |                                                  |                          | 7.74 (4.18–14.34) | <0.0001 |

Data are means ± SD (25/50/75th percentile) (since the variable is nonnormally distributed), or n (%). \*Only variables that showed a P value <0.20 in the unadjusted Cox regression analysis were offered to the multiple Cox regression analysis. HRs (95% CI) are provided only for the variables that turned out to be significant in a stepwise selection procedure of the multiple Cox regression analysis. †For comparison of patients with and without CVD complications. ‡P values for variables which did not significantly contribute to the Cox regression model. §Hypertension was defined as a systolic blood pressure ≥140 mmHg and/or diastolic blood pressure ≥90 mmHg and/or the current use of blood pressure-lowering drugs. ||Low-molecular weight (LMW) apolipoprotein(a) [apo(a)] phenotypes included all subjects with at least one apo(a) isoform with 11–22 K-IV repeats.

studies were also negative (15–17). Wollesen et al. (18) found Lp(a) to be related to toe systolic blood pressure but not to CVD. Another negative study (19) investigated a priori asymptomatic patients, which is again different from our and other studies. Preexisting CVD turned out to be one of the most important predictors of future CVD events in our study. Since many variables, including high Lp(a) levels, are also associated with previous CVD events, the exclusion of these patients might underestimate the predictive value of these variables.

Other studies that included type 1 and type 2 diabetic patients reported inconsistent results (20,21). The study by James et al. (20) reported an association of Lp(a) with ischemic heart disease or macroangiopathy.

Several investigations are available in type 2 diabetic patients, including four prospective studies (22–25). With the exception of one study (24), the other three showed positive associations (22,23,25). Together, these inconsistent results show a clear demand for further and larger studies. Our study is the largest prospective study in type 1 diabetic patients with a mean observation period of almost 6 years, therefore adding important information.

One of the strengths of our study is the prospective observation period of, on average, 5.8 years in a well-defined group of type 1 diabetic patients. We used stringent criteria for CVD complications of atherosclerotic origin, excluding entities such as heart failure. The main limitation of our study is that the investigated patients are not an incident cohort of newly identified type 1 diabetic patients but a prevalent cohort of patients with a wide variation of diabetes duration. Therefore, effects of survival bias could have influenced our results.

We conclude that an Lp(a) value  $>30$  mg/dl is strongly and independently associated with CVD complications in type 1 diabetic patients. Thus, measurement of Lp(a) in type 1 diabetic patients might be a helpful tool for stratifying patients with an increased risk for CVD complications, which could carry a higher predictive potential than some of the currently used measures in CVD risk profiles of type 1 diabetic patients.

**Acknowledgments**—This study was supported by the Austrian Diabetes Association and the GEN-AU-Project GOLD (to F.K.).

## References

- Dieplinger H, Kronenberg F: Genetics and metabolism of lipoprotein(a) and their clinical implications (part 1). *Wien Klin Wochenschr* 111:5–20, 1999
- Dieplinger H, Kronenberg F: Genetics and metabolism of lipoprotein(a) and their clinical implications (part 2). *Wien Klin Wochenschr* 111:46–55, 1999
- Danesh J, Collins R, Peto R: Lipoprotein(a) and coronary heart disease: meta-analysis of prospective studies. *Circulation* 102:1082–1085, 2000
- Craig WY, Neveux LM, Palomaki GE, Cleveland MM, Haddow JE: Lipoprotein(a) as a risk factor for ischemic heart disease: metaanalysis of prospective studies. *Clin Chem* 44:2301–2306, 1998
- Koschinsky ML, Marcovina SM: The relationship between lipoprotein(a) and the complications of diabetes mellitus. *Acta Diabetol* 40:65–76, 2003
- Kronenberg F, Auinger M, Trenkwalder E, Irsigler K, Utermann G, Dieplinger H: Is apolipoprotein(a) a susceptibility gene for type I diabetes mellitus and related to long-term survival? *Diabetologia* 42:1021–1027, 1999
- Kronenberg F, Lobentanz E-M, König P, Utermann G, Dieplinger H: Effect of sample storage on the measurement of lipoprotein(a), apolipoproteins B and A-IV, total and high-density lipoprotein cholesterol and triglycerides. *J Lipid Res* 35:1318–1328, 1994
- Koch M, Kutkuhn B, Trenkwalder E, Bach D, Grabensee B, Dieplinger H, Kronenberg F: Apolipoprotein B, fibrinogen, HDL cholesterol and apolipoprotein(a) phenotypes predict coronary artery disease in hemodialysis patients. *J Am Soc Nephrol* 8:1889–1898, 1997
- Levey AS, Bosch JP, Lewis JB, Greene T, Rogers N, Roth D: A more accurate method to estimate glomerular filtration rate from serum creatinine: a new prediction equation: Modification of Diet in Renal Disease Study Group. *Ann Intern Med* 130:461–470, 1999
- Kronenberg F, König P, Neyer U, Auinger M, Pribasniq A, Lang U, Reitingner J, Pinter G, Utermann G, Dieplinger H: Multi-center study of lipoprotein(a) and apolipoprotein(a) phenotypes in patients with end-stage renal disease treated by hemodialysis or continuous ambulatory peritoneal dialysis. *J Am Soc Nephrol* 6:110–120, 1995
- Kronenberg F: Epidemiology, pathophysiology and therapeutic implications of lipoprotein(a) in kidney disease. *Expert Rev Cardiovasc Ther* 2:729–743, 2004
- Zimmermann J, Herrlinger S, Pruy A, Metzger T, Wanner C: Inflammation enhances cardiovascular risk and mortality in hemodialysis patients. *Kidney Int* 55:648–658, 1999
- Stenvinkel P, Heimbürger O, Tuck CH, Berglund L: Apo(a)-isoform size, nutritional status and inflammatory markers in chronic renal failure. *Kidney Int* 53:1336–1342, 1998
- Haffner SM, Moss SE, Klein BEK, Klein R: Lack of association between lipoprotein(a) concentrations and coronary heart disease mortality in diabetes: the Wisconsin Epidemiologic Study of Diabetic Retinopathy. *Metabolism* 41:194–197, 1992
- Maser RE, Usher D, Becker DJ, Drash AL, Kuller LH, Orchard TJ: Lipoprotein(a) concentration shows little relationship to IDDM complications in the Pittsburgh Epidemiology of Diabetes Complications Study cohort. *Diabetes Care* 16:755–758, 1993
- Winocour PH, Durrington PN, Bhatnagar D, MBewu AD, Ishola M, Mackness M, Arrol S: A cross-sectional evaluation of cardiovascular risk factors in coronary heart disease associated with type 1 (insulin-dependent) diabetes mellitus. *Diabetes Res Clin Pract* 18:173–184, 1992
- Knöbl P, Pietschmann P, Schnack C, Prager R, Schernthaner G: Apolipoprotein(a) levels in patients with type 1 diabetes mellitus are unrelated to metabolic control or vascular disease. *Wien Klin Wochenschr* 106:728–732, 1994
- Wollesen F, Dahlen G, Berglund L, Berne C: Peripheral atherosclerosis and serum lipoprotein(a) in diabetes. *Diabetes Care* 22:93–98, 1999
- Hegele RA, Connelly PW, Armstrong PW, Langer A: Lipoprotein(a) and silent myocardial ischemia in IDDM (Letter). *Diabetes Care* 17:1365–1367, 1994
- James RW, Boemi M, Sirolla C, Amadio L, Fumelli P, Pometta D: Lipoprotein(a) and vascular disease in diabetic patients. *Diabetologia* 38:711–714, 1995
- Ritter MM, Loscar M, Richter WO, Schwandt P: Lipoprotein(a) in diabetes mellitus. *Clin Chim Acta* 214:45–54, 1993
- Hernandez C, Francisco G, Chacon P, Simo R: Lipoprotein(a) as a risk factor for cardiovascular mortality in type 2 diabetic patients: a 10-year follow-up study. *Diabetes Care* 28:931–933, 2005
- Hiraga T, Kobayashi T, Okubo M, Nakanishi K, Sugimoto T, Ohashi Y, Murase T: Prospective study of lipoprotein(a) as a risk factor for atherosclerotic cardiovascular disease in patients with diabetes. *Diabetes Care* 18:241–244, 1995
- Abu-Lebdeh HS, Hodge DO, Nguyen TT: Predictors of macrovascular disease in patients with type 2 diabetes mellitus. *Mayo Clin Proc* 76:707–712, 2001
- Shai I, Schulze MB, Manson JE, Stampfer MJ, Rifai N, Hu FB: A prospective study of lipoprotein(a) and risk of coronary heart disease among women with type 2 diabetes. *Diabetologia* 48:1469–1476, 2005 [erratum in *Diabetologia* 48:2691–2692, 2005]
